# Supplementary material for: Experiences of Healthcare Professionals Regarding Simulation Based Training Approach During COVID 19 – a descriptive qualitative study from a Low Middle-Income Country, Pakistan.
Source: Research Square preprint supplement (doi:10.21203/rs.3.rs-6241378/v1), 2025-05-09
Supplement: Supplementary file 1 [file 4adcb51705c688091d802086.docx]

**Consolidated criteria for reporting qualitative studies (COREQ): 32-item checklist**

| **#** | **Item** | **Guide questions/description** | **Comments** |
| --- | --- | --- | --- |
| **Domain 1: Research team and reflexivity** | | | |
| **Personal Characteristics** | | | |
| 1. | Interviewer/facilitator | Which author/s conducted the interview or focus group? | Sana Hirani conducted the interviews. |
| 2. | Credentials | What were the researcher's credentials? *E.g. PhD, MD* | **Sana Muhammad Ali Hirani**, MScN, BScN, RN, RM  **Laila Akbar Ladak**, PhD, MScN, BScN, RN  **Amber Sabeen,** MRCP, MBBS  **Zohra Kurji,** RN, RM, IBCLC, MSc, CHSE-A |
| 3. | Occupation | What was their occupation at the time of the study? | **Sana Muhammad Ali**,  MScN Student  The Aga Khan University School of Nursing and Midwifery  **Laila Akbar Ladak**, PhD, MScN, BScN, RN  Associate Professor, Assistant Dean Graduate Programs  School of Nursing and Midwifery, Joint appointment with  The Department of Paediatrics, The Aga Khan University,  Pakistan  Honorary Faculty, Susan Wakil School of Nursing and  Midwifery, Sydney Nursing School, The University of  Sydney, Australia. ​  Editorial Board Member, Journal of Paediatric Nursing:  Nursing Care of Children and Families, the official journal  of the Society of Paediatric Nurses and the Paediatric  Endocrinology Nursing Society.  PLOS Global Public Health - Section Editor Nursing and  Midwifery  **Amber Sabeen,** MBBS, MRCP, EDIC, MSC  Associate Professor  Department of Critical Care Medicine  The Aga Khan University, Pakistan  **Dr Zohra Kurji,** RN, RM, IBCLC. MSc, CHSE-A,  Assitant Professor, Lactation Consultant and Section Head  Palliative care and Oncology Clinical Stream School of  Nursing and Midwifery (SONAM) |
| 4. | Gender | Was the researcher male or female? | All the interviews were conducted by a female (SH). |
| 5. | Experience and training | What experience or training did the researcher have? | The primary investigator (SH) is a MScN student at The Aga  Khan University School of Nursing and Midwifery. |
| **Relationship with participants** | | | None of the team member had any relationship with the  participants. |
| 6. | Relationship established | Was a relationship established prior to study commencement? | A rapport was built with the participants during the  quantitative data collection and informed consent was signed. |
| 7. | Participant knowledge of the interviewer | What did the participants know about the researcher? e*.g. personal goals, reasons for doing the research* | Participants were given a consent form which provide them  about the understanding of objectives, outcomes, and the  detail about the study. |
| 8. | Interviewer characteristics | What characteristics were reported about the interviewer/facilitator? e.g. *Bias, assumptions, reasons and interests in the research topic* | The following statement has been added under “Strength and  limitations” section page number 22-23.  Credibility was ensured through triangulation, in which two  researchers (SH and LL) reviewed the transcripts.  Dependability was enhanced by interviews collected within a  confined period and peer-debriefing was also carried out for  accuracy of findings.  Conformability was maintained by initial independent coding  by a researcher (SH), later rechecking by another  researcher (LL, ZJ and AS).  Transferability is facilitated by a clear description of  participant characteristics and a specific focus on healthcare  professional who worked in COVID areas of LMIC setting. |
| **Domain 2: study design** | | | |
| **Theoretical framework** | | | The Jeffries theoretical model framework was used as a  guiding framework. |
| 9. | Methodological orientation and Theory | What methodological orientation was stated to underpin the study? *e.g. grounded theory, discourse analysis, ethnography, phenomenology, content analysis* | It was a qualitative study and content analysis was conducted  for the analysis. |
| **Participant selection** | | | |
| 10 | Sampling | How were participants selected? *e.g. purposive, convenience, consecutive, snowball* | Purposive sampling was opted for because the target group  was highly specific, which included only healthcare  professionals who had worked in the COVID areas and  attended the simulation-based training during  COVID 19 pandemic.  **Inclusion Criteria** participants who had at least two years of  direct patient care experience, attended simulation-based  training during the COVID-19 pandemic and completed at  least one or more simulation-based training, mainly  high-fidelity SIM-MAN 3G |
| 11 | Method of approach | How were participants approached? e*.g. face-to-face, telephone, mail, email* | A face-to-face semi-structured interview. |
| 12 | Sample size | How many participants were in the study? | 17 participants: six doctors, eight nurses, and three  Physiotherapists |
| 13 | Non-participation | How many people refused to participate or dropped out? Reasons? | Refusals 9 and participants didn’t respond 12 (n=21).  (Supplementary file) |
| **Setting** | | | |
| 14 | Setting of data collection | Where was the data collected? e*.g. home, clinic, workplace* | Participants were interviewed in a private room to  facilitate free expression and to maintain confidentiality. |
| 15 | Presence of non-participants | Was anyone else present besides the participants and researchers? | Nobody except the participants and the researcher were  present during the interviews. |
| 16 | Description of sample | What are the important characteristics of the sample? *e.g. demographic data, date* | The sample characteristics is highlighted in Table 1 and 2  (Page number 11 and 12) |
| **Data collection** | | | |
| 17 | Interview guide | Were questions, prompts, guides provided by the authors? Was it pilot tested? | Yes, a semi-structured interview guide was used to explore  their experiences regarding the simulation-based  training during COVID-19.  To ensure for the interview guide’s face and content validity,  it was piloted on two participants. There was one question  regarding recommendation which was revised for better  clarity and ease to comprehend for the participant. |
| 18 | Repeat interviews | Were repeat interviews carried out? If yes, how many? | None of the interviews were repeated. |
| 19 | Audio/visual recording | Did the research use audio or visual recording to collect the data? | Yes, the interviews were audio recorded. |
| 20 | Field notes | Were field notes made during and/or after the interview or focus group? | Yes, the field notes were maintained during the interviews. |
| 21 | Duration | What was the duration of the interviews or focus group? | Mean interview time was 40 minutes (range 40 to 45 minutes). |
| 22 | Data saturation | Was data saturation discussed? | Yes, data saturation is highlighted in the manuscript under  “Data Collection” section, page 9  Data collection was continued till data saturation was  attained, by ensuring that no new information was following  and there were no repetitions during data collection. Since  data saturation was achieved after 15th interviews. Two  additional interviews were completed, increasing  participation to 17th participant, but there were no further  new findings in these subsequent interviews following  which the data collection was stopped. |
| 23. | Transcripts returned | Were transcripts returned to participants for comment and/or correction? | No, this was not required. |
| **Domain 3: analysis and findings** | | | |
| Data analysis | | |  |
| 24 | Number of data coders | How many data coders coded the data? | Conformability was supported by initial independent coding  a researcher (SH), later rechecking by another  researcher (LL, ZJ and AS). |
| 25 | Description of the coding tree | Did authors provide a description of the coding tree? | Yes, description of the coding tree is mentioned under the  “Finding” section and has also been illustrated  in table 3 (page 18-19) |
| 26 | Derivation of themes | Were themes identified in advance or derived from the data? | Themes were identified from the data. Table 3 (page 18-19)  also provides an illustration of the identified  themes and sub themes. |
| 27 | Software | What software, if applicable, was used to manage the data? | Data management was done manually and no software  was used. |
| 28 | Participant checking | Did participants provide feedback on the findings? | No |
| **Reporting** | | | |
| 29 | Quotations presented | Were participant quotations presented to illustrate the themes / findings? Was each quotation identified? e*.g. participant number* | Yes, participant quotations were presented to support the  identified themes and sub themes. In addition, the  participants are referred to by pseudonym. |
| 30 | Data and findings consistent | Was there consistency between the data presented and the findings? | Yes, there was consistency between the data presented  and the findings. |
| 31 | Clarity of major themes | Were major themes clearly presented in the findings? | Yes, major themes have been clearly presented in the  findings under “Finding” section and has also been  illustrate in figure 3 (page 18-19) |
| 32 | Clarity of minor themes | Is there a description of diverse cases or discussion of minor themes? | Yes, sub themes and codes have also been highlighted. |
