# Supplementary material for: Experiences of Healthcare Professionals Regarding Simulation Based Training Approach During COVID 19 – a descriptive qualitative study from a Low Middle-Income Country, Pakistan.
Source: Research Square preprint supplement (doi:10.21203/rs.3.rs-6241378/v1), 2025-05-09
Supplement: Supplementary file 2 [file ecadcd960106ae4b533c8d9a.docx]

**Data Collection Interview Guide (English)**

**Experiences of Healthcare Professionals Regarding Simulation Based Training Approach During COVID 19 – a descriptive qualitative study from a Low Middle-Income Country, Pakistan**

**Participants Code** ……….

The interview guide has 2 sections. The first part is about the demographic data and characteristics of the participants and the second part consists of semi-structured interview questions about the experiences of health care professionals, barriers, and challenges faced during the simulation-based training approach.

Part A: **Demographic Data**

**Instruction:** Please complete the demographic section by tick mark and fill in the appropriate answers

1.           Age: ………

2.           Gender:                   Male                                    Female

3.           Qualification ……………

4.           Current Designation (Job Title) ………….

5.           Area of specialty……………….

6.           Service Line: …………….

7.           Number of experience in the current service line (years) ……….

8.        The total number of clinical experience (years)......................

9.           Number of simulation-based classes attended in the last 1 year………..

10.        How often do you attend simulation-based courses?

a.     Monthly

b. Quarterly

c.     Half Yearly

d. Annually

11.  Type of simulation training attended:

a.     High Fidelity

b. Low Fidelity

c.     Task Trainer

d. Other

12.  Duration of the course: ……………

**Open-Ended Questionnaire: (PART 2)**

A.    Experiences about simulation-based training program during COVID 19 pandemic

a.      What is your understanding of simulation-based learning?

PROBE: Can you please tell me about your experience?

b.      What experience enhanced your learning during simulation training during a pandemic?

PROBE:  Do you think simulation-based training approaches are necessary during this pandemic? If yes how?

c. What are the few advantages and disadvantages of this learning approach?

d. What are the barriers to the simulation training approach during the COVID 19 pandemic?

Probe: what factors hindered your learning?

How they have been hindered? Please explain further with example

e. What are some of the simulation training that you have taken?

B.          Practice implementation:

a.      Has the simulation experience prepared you for your actual clinical setting?

Probe: Please explain, how?

b.     What advanced skills were you able to learn and implement in clinical areas?

Probe: To what extent has your learning is improved?

c.      What kind of challenges do you face to implement learned concepts into actual practice? For example

d.     During which part of the simulation experience did you learn the most about the priority of patient care?

PROBE: What factors facilitate your learning?

            Can you elaborate further with examples?

e. What preparation you have done to enhance your learning before taking any simulation-based courses?

C.          About Facilitator/Supervisor:

a.      What do you think about the facilitators who are conducting the course?

Probe: were you satisfied with your facilitator?

   Was the time adequate for training?

b. What strategies do they use to enhance your learning?

c. How you were facilitated by your facilitator? Please explain

d. Were students given additional time if they are unable to comprehend the concept?

D.          Briefing and Debriefing:

a.      How do you define the term briefing and debriefing?

b. What kind of instruction do you receive during briefing and debriefing

PROBE: Please explain further

c. Why Briefing and Debriefing are important in this learning approach?

d. What strategies were used for Briefing and Debriefing in the course?

E.     Comparison of previous simulation training experience with current experience

a. Have you ever attended any simulation training before the pandemic? If YES can you please share your experience?

PROBE: What were the similarities and differences in those training?

What do you think was most effective and how?

E.          Recommendations:

a.      Is there anything else you would like to discuss that I have not covered or asked about regarding the simulation experience?

b.     Would you like to give any suggestions for improving the current simulation-based courses?  Probe: If yes, how?

**[Shut off tape].**

**Thank you very much for talking to me today, I appreciate your time and thoughtful input on this. If you think of anything else that you forgot to say, please feel free to email me and I would be happy to add it to the transcript of our conversation.**

**Data Collection Interview Guide (Urdu)**

**معلومات اکٹھی کرنے کے لئے انٹرویو گائیڈ**

مطالعے کا عنوان: **کراچی، پاکستان کے تیسرے درجے کی دیکھ بھال کے ہسپتال میں، کووڈ 19 کی وباء کے دوران بناوٹی اشیاء پر مشتمل (simulation based) تدریب کی رسائی سے متعلق صحت کی دیکھ بھال کے ماہرین کے خیالات اور احساسات کی چھان بین**

**شرکت کنندگان کا کوڈ: _________**

یہ انٹرویو گائیڈ دو حصوں پر مشتمل ہے۔ پہلا حصہ مطلالعے میں شریک افراد کی شماریاتی معلومات اور خصوصیات سے متعلق ہے اور دوسرا حصہ مصنوعی اشیاء پر مشتمل (simulation based) ٹریننگ تک رسائی کے دوران پیش آنے والی رکاوٹوں اور چیلجنز سے متعلق نیم ڈھانچے پر مشتمل انٹرویو سوالات پر مبنی ہے۔

حصہ الف: **شماریاتی معلومات**

**ہدایات:** براہ مہربانی شماریاتی حصہ صحیح کا نشان لگاکر مکمل کیجئے اور مناسب جوابات پُر کیجئے۔

1۔ عمر: _______

2۔ جنس: مرد خاتون

3۔ تعلیمی معیار: ____________

4۔ موجودہ عہدہ (ملازمت کا عہدہ) __________

5۔ مہارت : __________

6۔ سروس لائن: __________

7۔ موجودہ سروس لائن میں تجربہ (سالوں کی تعداد): __________

8۔ کلینکل تجربہ (سالوں کی تعداد): __________

9۔ پچھلے ایک سال میں simulation پر مشتمل کلاسوں میں شرکت کی تعداد: __________

10۔ آپ کتنی مرتبہ simulation پر مشتمل کورسز میں شرکت کرتے ہیں؟

الف) ہر مہینہ

ب) ہر تین مہینے

ج) ہر چھ مہینے

د) ہر سال

11۔ شرکت کی جانے والی simulation ٹریننگ کی نوعیت:

الف) اعلیٰ درجے کی وفاداری

ب) کم درجے کی وفاداری

ج) ٹاسک ٹرینر

د) کوئی اور

12۔ کورس کا دورانیہ: ___________

حصہ ب: **آزادانہ سوالنامہ:**

الف) کووڈ 19 کی وباء کے دوران simulation پر مبنی ٹریننگ پروگرام کے بارے میں خیالات:

الف) simulation پر مبنی قابلیت کے بارے میں آپ کیا کہتے ہیں؟

چھان بین: کیا آپ اپنے تجربے کے متعلق بتا سکتے ہیں؟

ب) وباء کے دوران ہونے والی simulation ٹریننگ کے دور ان کس تجربے نے آپ کی مہارت میں اضافہ کیا؟

چھان بین: کیا آپ سمجھتے ہیں کہ اس وباء کے دوران simulation ٹریننگ تک رسائیاں ضروری ہیں؟

اگر ہاں، تو کیسے؟

ج) کووڈ وباء میں اس مہارت تک رسائی کے کیا چند فائدے اور نقصانات ہیں؟

د) کووڈ 19 کی وباء کے دوران simulation پر مبنی ٹریینگ تک رسائی میں کیا رکاوٹیں ہیں؟

چھان بین: آپ کو سیکھنے میں کن اسباب نے رکاوٹ ڈالی؟

انہوں نے آپ کو کیسے روکا ہے؟ براہ مہربانی مثال کے ساتھ تفصیل سے بتائیے

ہ) وہ کون سی چند simulation trainings ہیں جو آپ لے چکے ہیں؟

ب) پریکٹس کا اطلاق:

الف) کیا simulation کے تجربے نے آپ کو آپ کی اصل کلینکل سیٹنگ کے لئے تیار کیا ہے؟

چھان بین: براہ مہربانی وضاحت کیجئے، کیسے؟

ب) آپ کون سی مزید بہتر صلاحیتیں سیکھنے اور کلینیکل جگہوں پر ان کو لاگو کرنے کے قابل تھے؟

چھان بین: کس حد تک آپ کی قابلیت بہتر ہوئی ہے؟

ج) حقیقی پریکٹس میں سیکھےگئے خیالات کو لاگو کرنےمیں آپ کو کس نوعیت کے چیلنجز کا سامنا ہوتا ہے؟ مثلاً

د) simulation تجربے کے کس حصے میں آپ نے مریض کی دیکھ بھال کی ترجیح کے بارے میں سب سے زیادہ سیکھا؟

چھان بین: کون سے اسباب آپ کے سیکھنے میں آسانی پیدا کرتے ہیں؟

کیا آپ مزید تفصیلات بتا سکتے ہیں؟

ہ) simulation پر مشتمل کورسز میں حصہ لینے سے قبل آپ نے اپنی قابلیت میں اضافے کے لئے کیا تیاری کی؟

ج) سہولت کار/سپروائزر کے بارے میں:

الف) ان سہولت کاروں کے بارے میں جو کورس پیش کررہے ہیں ان کے بارے میں آپ کا کیا خیال ہے؟

چھان بین: کیا آپ اپنے سہولت کار سے مطمئن تھے؟

کیا تدریب کے لئے دیا گیا دورانیہ مناسب تھا؟

ب) وہ آپ کی قابلیت بڑھانے کےلئے کیا حکمت عملیاں استعمال کرتے ہیں؟

ج) آپ کو اپنے سہولت کار سے کیسی سہولت دی گئی؟ براہ مہربانی واضح کیجئے۔

د) کیا طلباء کو مزید وقت دی گیا تھا اگر وہ اس تصور کو سمجھنے کے قابل نہیں تھے؟

د) ابتدائی ہدایات اور تفتیش:

الف) ابتدائی ہدایات اور تفتیش کی اصطلاح کو آپ کیسے بیان کریں گے؟

ب) ابتدائی ہدایات اور تفتیش کے دوران آپ کے کس قسم کی ہدایت حاصل کی؟

چھان بین: براہ مہربانی مزید وضاحت کیجئے

ج) سیکھنے کی اس رسائی میں ابتدائی ہدایات اور تفتیش کیوں ضروری ہیں؟

د) کورس میں ابتدائی ہدایات اور تفتیش کے لئے کیا حکمت عملیاں استعمال کی گئی تھیں؟

ہ) پچھلے simulation تجربے کا موجودہ تجربے سے موازنہ:

الف) کیا آپ وباء سے قبل کسی simulation تدریب میں شریک ہوئے ہیں؟ اگر ہاں، تو کیا آپ اپنے تجربے پر تبادلہ کرسکتے ہیں؟

چھان بین: ان تدریبوں میں کیا یکسانیتیں اور فرق تھے؟

آپ کیا سمجھتے ہیں سب سے زیادہ موثر کون سی تھی اور کیسے؟

و) سفارشات:

الف) کیا ایسی کوئی اور چیز ہے جس پر آپ بات کرنا چاہیں جو میں نے simulation تجربے سے متعلق شامل نہ کی ہو یا پوچھی نہ ہو؟

ب) آپ موجودہ simulation پر مبنی کورسز کو بہتر بنانے کےلئے کوئی تجاویز دینا چاہیں گے؟

چھان بین: اگر ہاں، تو کیسے؟

(ٹیپ بند کردیجئے)

ہم سے آج آپ کا گفتگو کرنے کا شکریہ ۔ اس سلسلے میں آپ کے وقت اور غوروفکر پر مبنی معلومات کی تعریف کرنا چاہوں گی۔ اگر آپ سمجھتے ہیں کہ آپ کوئی بات بتانے سے بھول رہے ہیں توبلا جھجک مجھے ای میل کردیجئے گا اور مجھے اس کو اپنی گفتگو میں شامل کرنے پر خوشی ہوگی۔
